# Supplementary material for: Synthesis of Novel Sulfamethaoxazole 4-Thiazolidinone Hybrids and Their Biological Evaluation
Source: MDPI journal article supplement (doi:10.3390/molecules25163570), 2020-08-06

# Synthesis of novel sulfamethaoxazole 4-thiazolidinone hybrids and their biological evaluation

Mashooq A. Bhat<sup>a,\*</sup>, Mohamed A. Al-Omar<sup>a</sup>, Ahmed M. Naglah<sup>b,c</sup>, Azmat Ali Khan<sup>a</sup>

<sup>a</sup>*Department of Pharmaceutical Chemistry, College of Pharmacy, King Saud University, Riyadh 11451, Saudi Arabia*

<sup>b</sup>*Department of Pharmaceutical Chemistry, Drug Exploration and Development Chair (DEDC), College of Pharmacy, King Saud University, Riyadh 11451, Saudi Arabia*

<sup>c</sup>*Peptide Chemistry Department, Chemical Industries Research Division, National Research Centre, 12622 - Dokki, Cairo, Egypt*

\*Corresponding author: E-mail: [mabhat@ksu.edu.sa](mailto:mabhat@ksu.edu.sa); Phone: [+966558164097](tel:+966558164097)

---

## Experimental section Chemistry

All chemicals and solvents were purchased with high purities and used without further purification. The progress of the reaction was monitored by thin layer chromatography (using silica gel 60 F-254 plates). The products were visualized with a 254 nm UV lamp. Melting points were determined by open capillary methods and are uncorrected. Products were purified by column chromatography on 100-200 mesh silica gel. The <sup>1</sup>H NMR spectra were recorded on 400 spectrometers using tetramethylsilane (TMS) as an internal standard. The <sup>13</sup>C NMR spectra were recorded at 100 MHz and chemical shifts were reported in parts per million (δ) relative to tetramethylsilane (TMS) as an internal standard. Coupling constant (J) values were reported in hertz (Hz). The splitting patterns of the proton are described as s (singlet), d (doublet), dd (doublet of doublet), t (triplet), and m (multiplet) in <sup>1</sup>H NMR spectroscopic analysis. The products were confirmed by <sup>1</sup>H and <sup>13</sup>C NMR spectroscopy analysis. High-resolution mass spectra (HRMS) were obtained using Agilent 6520 (QTOF) ESI-HRMS model.

## Experimental protocol for biological activity

### Pharmacology

#### Antitubercular assay

All the synthetic compounds were screened for their *in vitro* activity against MTB (ATCC 25177) and *M. bovis* BCG (ATCC 35743) using two fold dilution technique, in order to determine the actual minimum inhibitory concentration (MIC<sub>90</sub>). Activity against MTB was determined through the XTT reduction menadione assay (XRMA) reading absorbance at 470 nm. The nitrate reductase (NR) assay was performed to estimate inhibition of *M. bovis* BCG by compounds.<sup>2</sup> Absorbance for the NR assay was measured at 540 nm. *In vitro* activity against MTB and *M. bovis* BCG at active (8 days) and dormant (12 days) stages was performed using the XRMA and NR assay, respectively, as described above. Percentage inhibition was calculated using the following formula:

$$\% \text{ inhibition} = [(\text{control} - \text{CMP}) / (\text{control} - \text{blank})] \times 100$$

Where ‘control’ is the activity of mycobacteria without compounds, ‘CMP’ is the activity of mycobacteria in the presence of compounds and ‘blank’ is the activity of the culture medium without mycobacteria.

#### Cytotoxicity assay

2-chloro quinoline incorporated xanthene derivatives **7a-l** were assayed for their cytotoxic effects in four different cell lines, MCF-7, HCT-116 and A549 using MTT assay<sup>3</sup>. The cell lines were maintained under standard cell culture conditions under 5% CO<sub>2</sub> at 37 °C in 95% air humidified environment. Each concentration was tested in duplicates in a single experiment. GI<sub>50</sub>/GI<sub>90</sub> values were calculated using OriginPro Software.

#### Selectivity Index:

The selectivity index was calculated by dividing the 50% growth inhibition concentration (GI<sub>50</sub>) for cell lines (MCF-7, HCT 116 and A549) by the MIC<sub>90</sub> for *in vitro* activity against dormant MTB and BCG.<sup>4</sup>

### Anti-Bacterial activity

All bacterial cultures were first grown in LB media at 37 °C at 180 RPM. Once the culture reaches 1 O.D, it is used for anti-bacterial assay. Bacterial strains *E. coli* (NCIM 2688- ATCC 25292), *P. fluorescense* (NCIM 2036-ATCC 13525) as gram-negative and *B. subtilis* (NCIM 2079-ATCC 23857), *S. aureus* (NCIM 2010- ATCC 29213) as gram-positive are used. The assay was performed in 96 well plates after 8 h. and 12 h for Gram negative and Gram positive bacteria, respectively. 0.1 % of 1 OD culture at 620 nm was used for screening,<sup>5</sup> 0.1 % inoculated culture was added in to each well of 96 well plate containing the compounds to be tested.

### References:

1. Weng, J.; Wang, C.; Li, H.; Wang, Y. *Green Chem.* **2006**, 8, 96
2. (a) Pardini, I.E.; Gagliardi, M.; Colone, M.C.; Stringaro, M.; Teloni, A.R.; Brunori, R.; Nisini, L.; Fattorini, R.; Giannoni, L.F. *Microbes Infect.* **2012**, 14, 959; (b) Sarkar, S.; Sarkar, D. *J. Biomol. Screen.* **2012**, 17, 966.
3. Ciapetti, G.; Cenni, E.; Pratelli, L.; Pizzoferrato, A. *Biomaterials* **1993**, 14, 359.
4. Kuete, V. *Planta Med.* **2010**, 76, 1479.
5. Singh, R.; Nawale, L. U.; Arkile, M.; Shedbalkar, U. U.; Wadhwani, S. A.; Sarkar, D.; Chopade, B. A. *Int. J. Antimicrob. Agents* **2015**, 46, 183.

**7a.**  $^1\text{H}$  NMR, 400 MHz,  $\text{DMSO-}d_6$

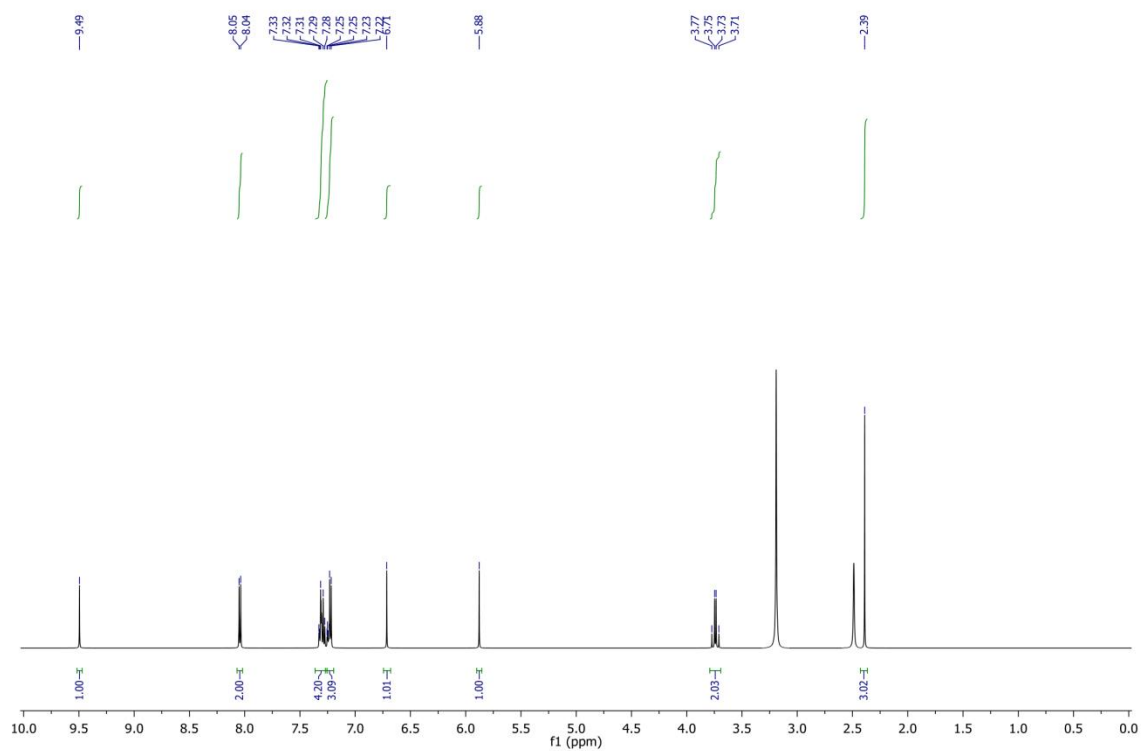

**7a.**  $^{13}\text{C}$  NMR, 100 MHz,  $\text{DMSO-}d_6$

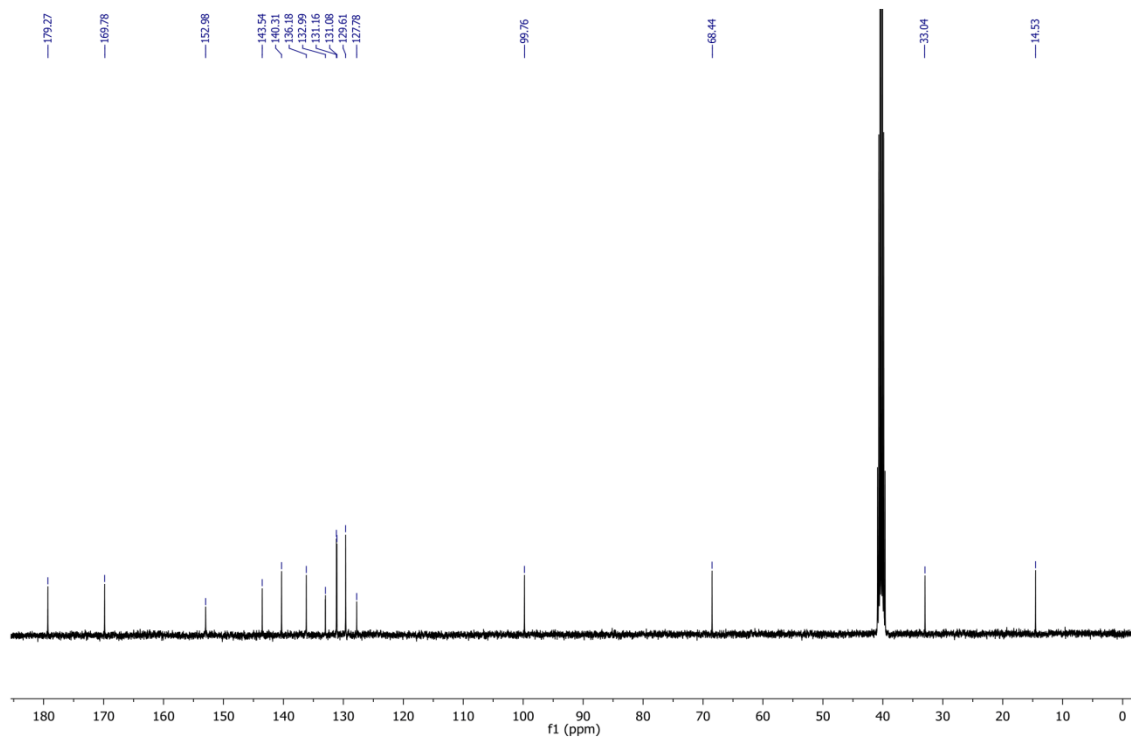

### 7a. HRMS

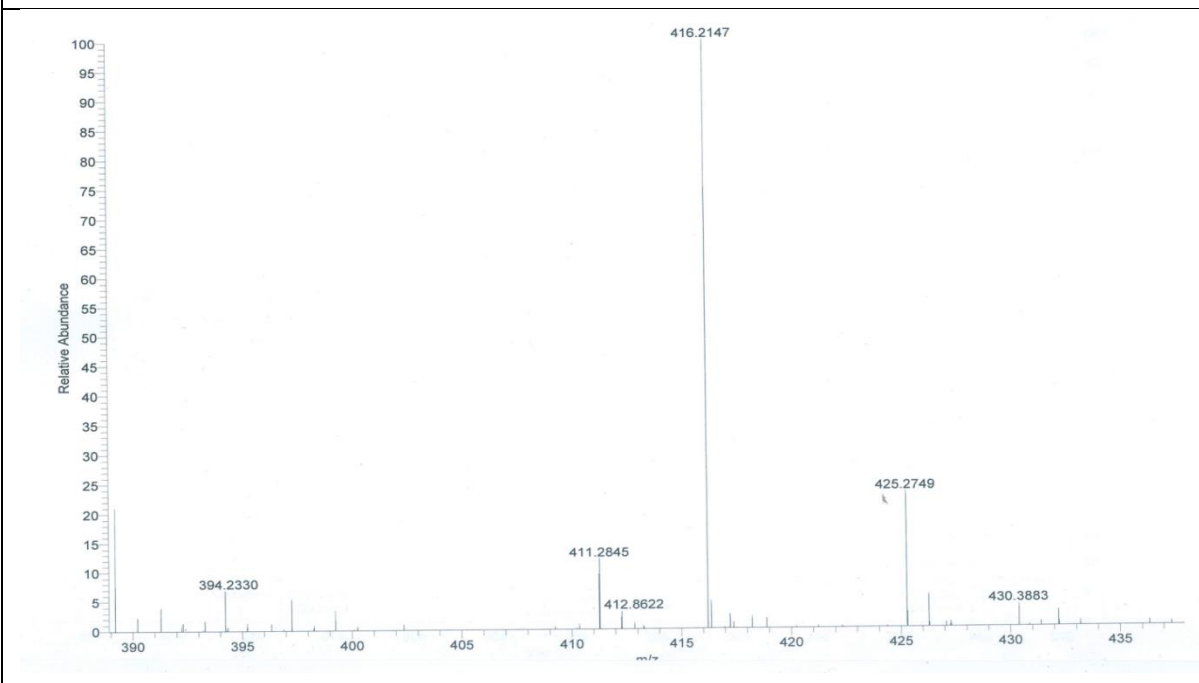

### 7b. $^1\text{H}$ NMR, 400 MHz, $\text{DMSO}-d_6$

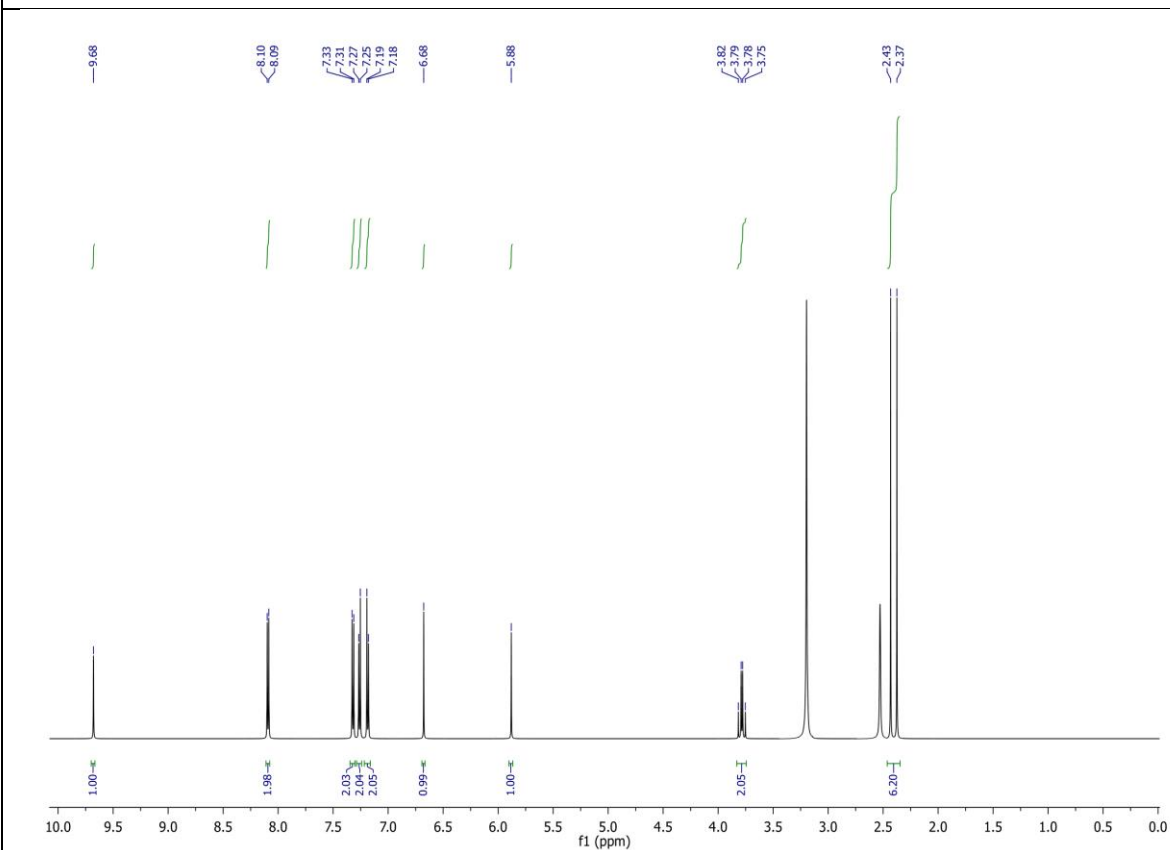

**3b.**  $^{13}\text{C}$  NMR, 100 MHz,  $\text{DMSO}-d_6$

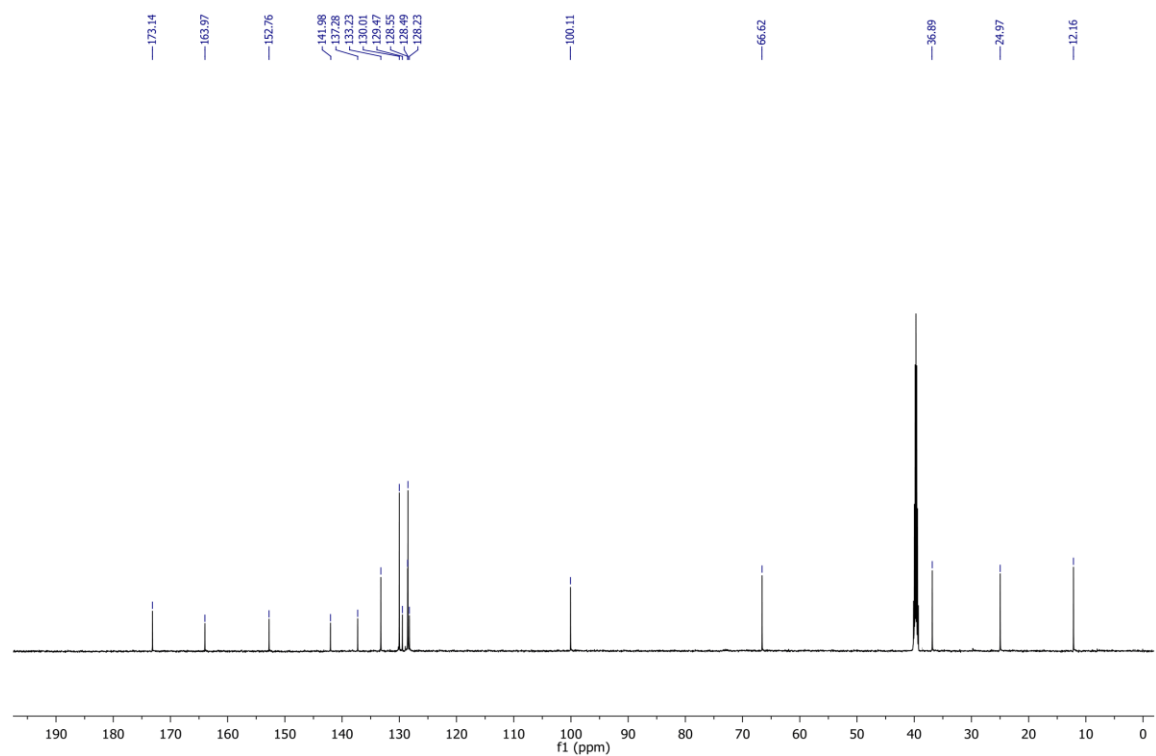

**3b.** HRMS

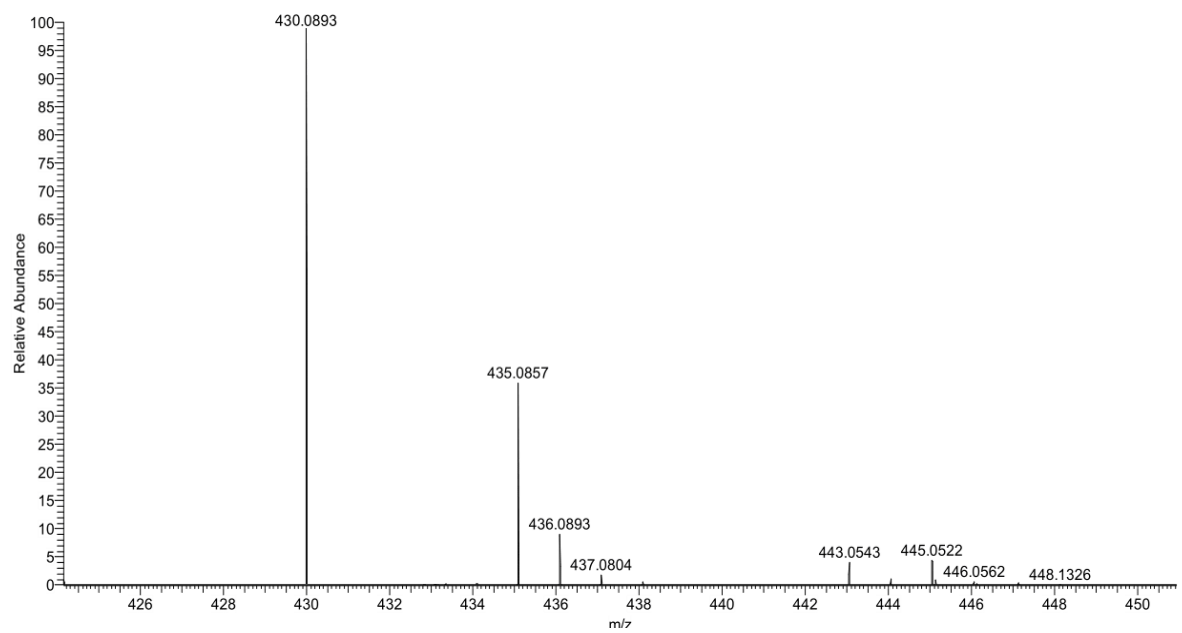

**7c.**  $^1\text{H}$  NMR, 400 MHz,  $\text{DMSO-}d_6$

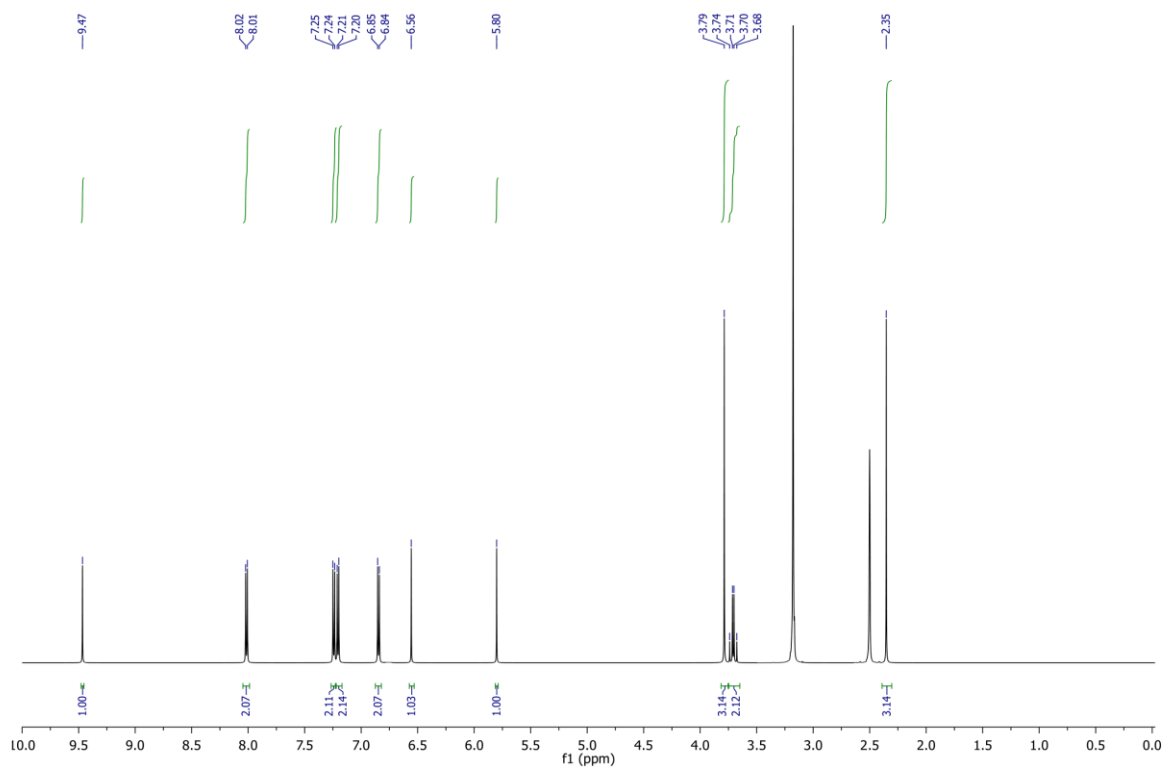

**7c.**  $^{13}\text{C}$  NMR, 100 MHz,  $\text{DMSO-}d_6$

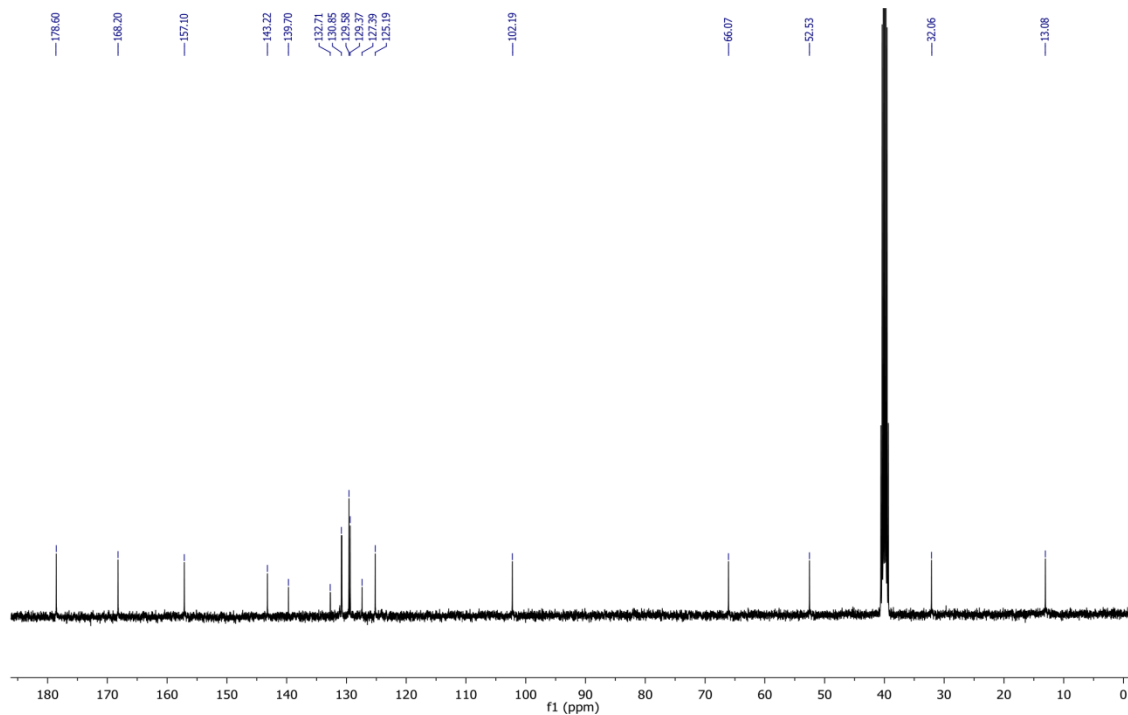

### 7c. HRMS

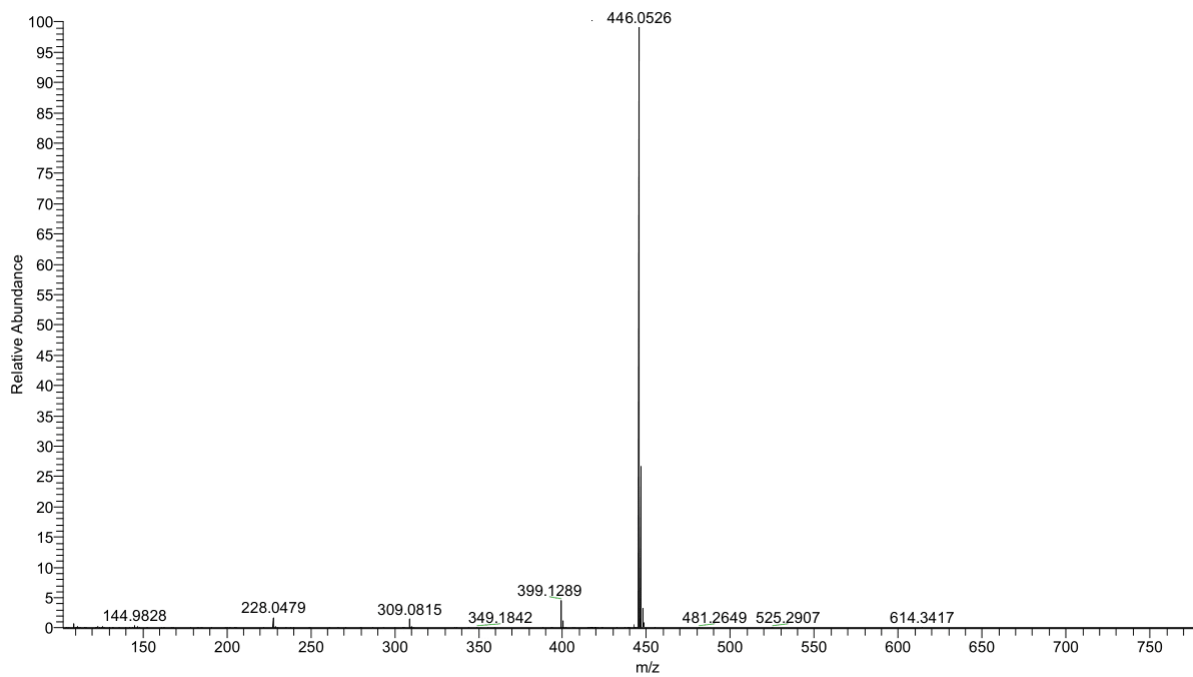

### 7d. $^1\text{H}$ NMR, 400 MHz, $\text{DMSO-}d_6$

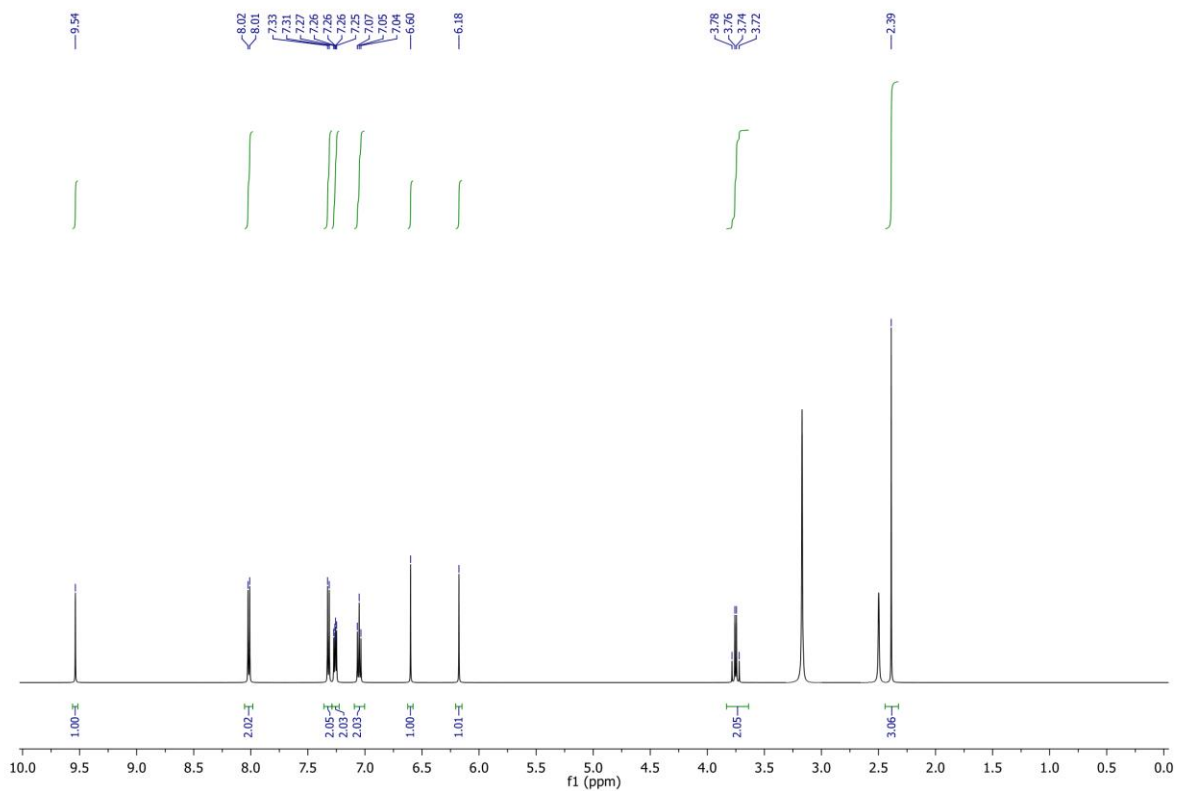



**7d.**  $^{13}\text{C}$  NMR, 100 MHz,  $\text{DMSO}-d_6$

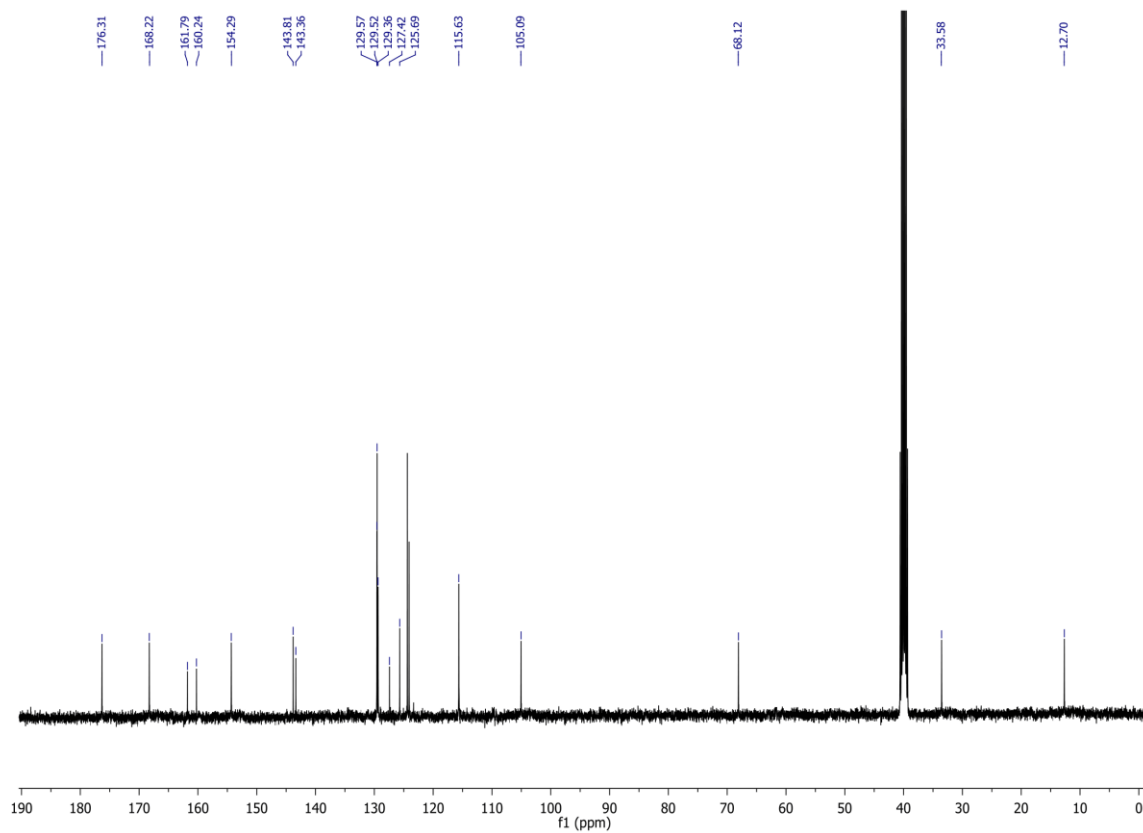

**7d.** HRMS

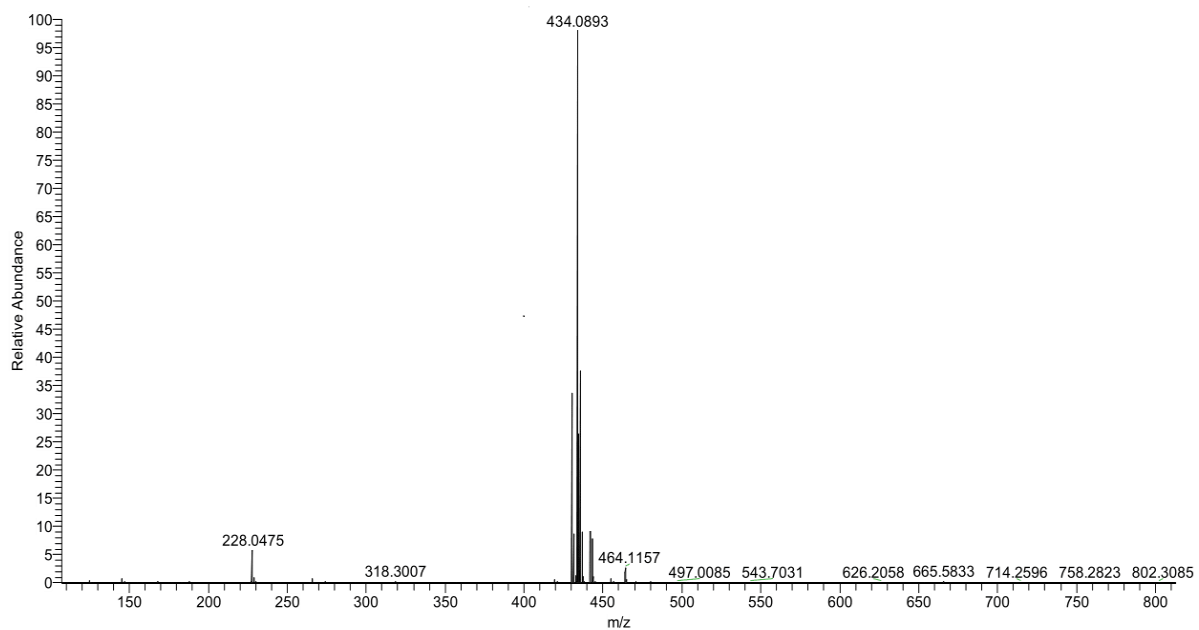

7e.  $^1\text{H}$  NMR, 400 MHz,  $\text{DMSO-}d_6$

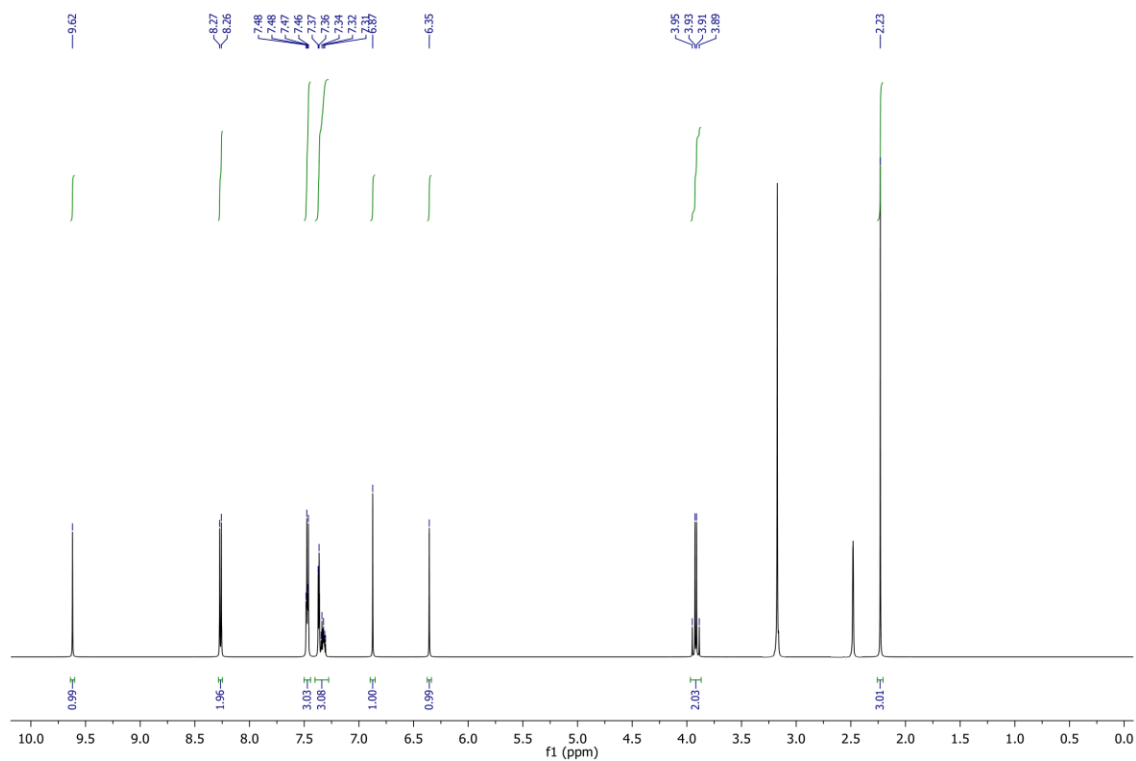

7e.  $^{13}\text{C}$  NMR, 100 MHz,  $\text{DMSO-}d_6$

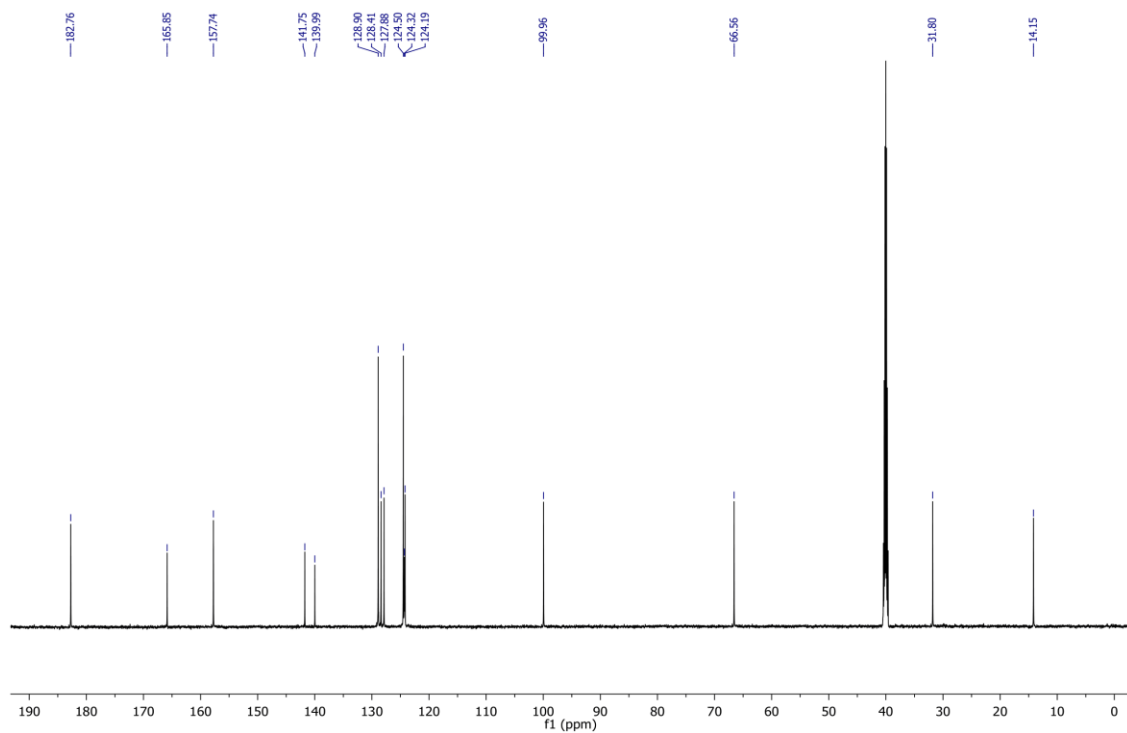

**7e. HRMS**

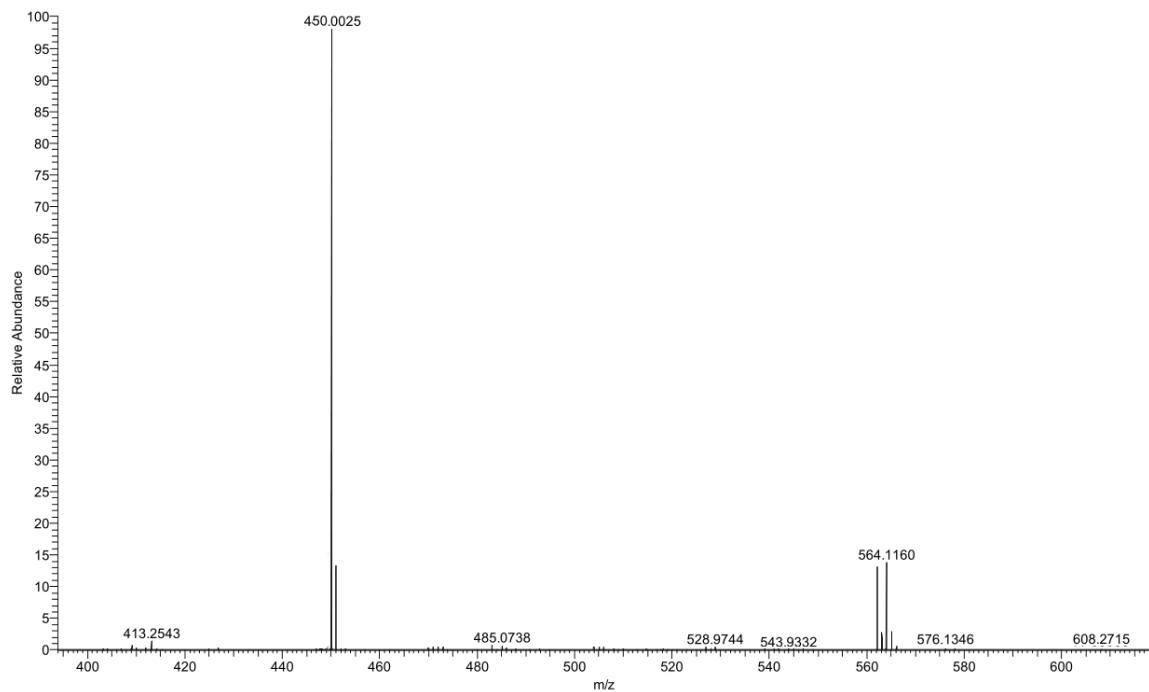

**7f.  $^1\text{H}$  NMR, 400 MHz,  $\text{DMSO}-d_6$**

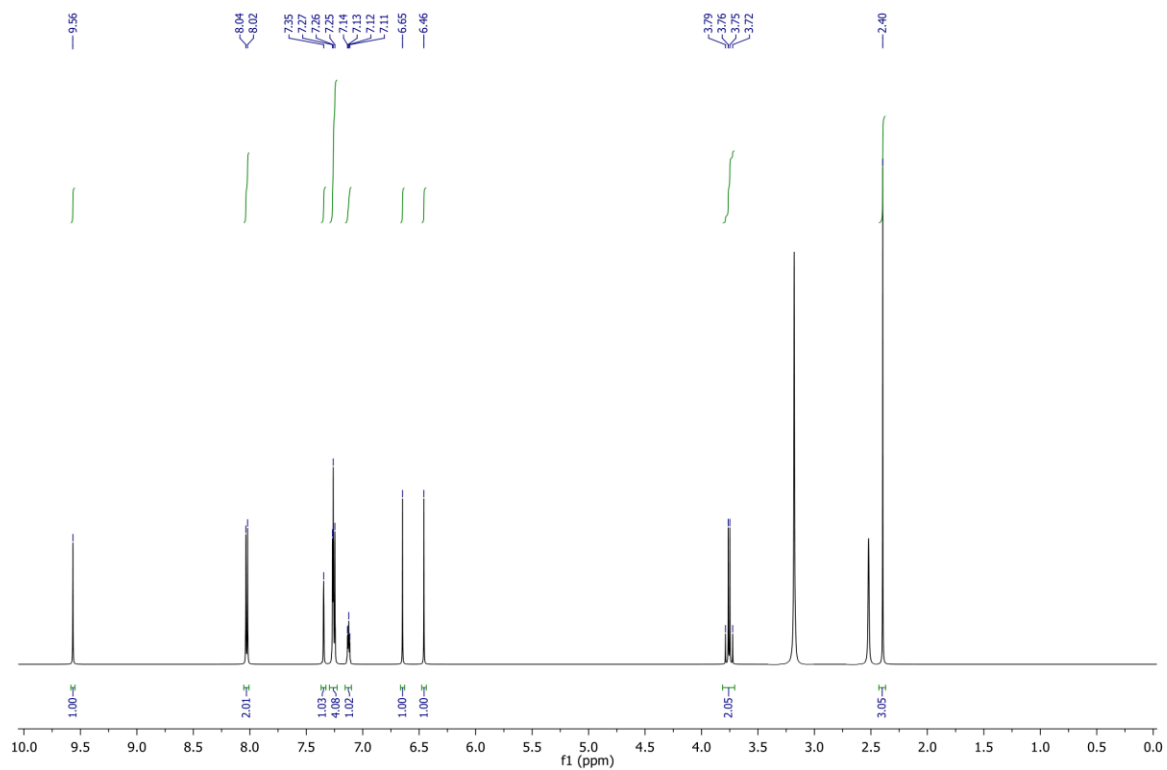

7f.  $^{13}\text{C}$  NMR, 100 MHz,  $\text{DMSO}-d_6$

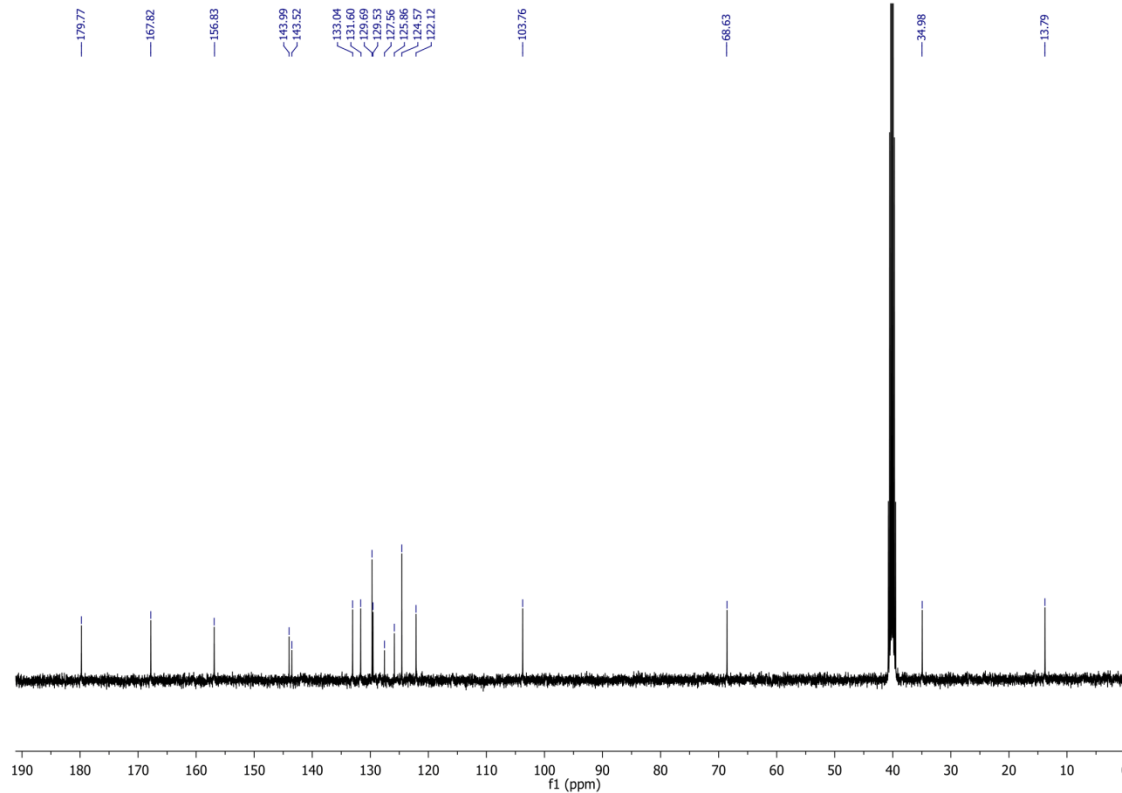

7f. HRMS

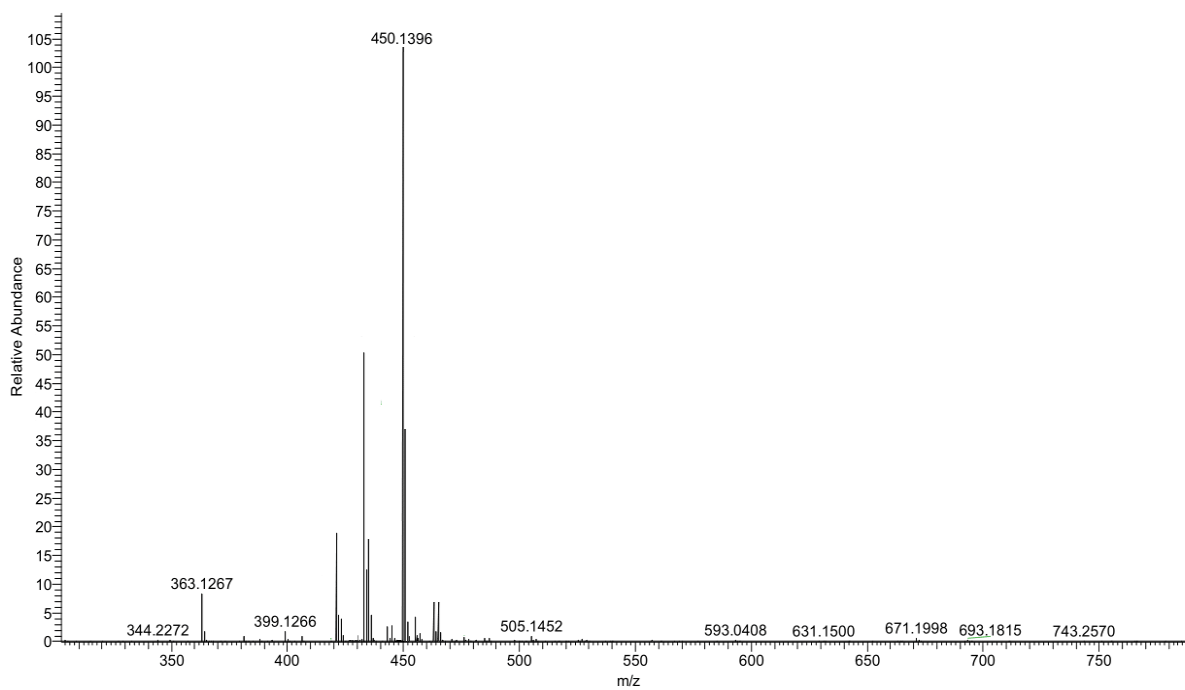

**7g.**  $^1\text{H}$  NMR, 400 MHz,  $\text{DMSO-}d_6$

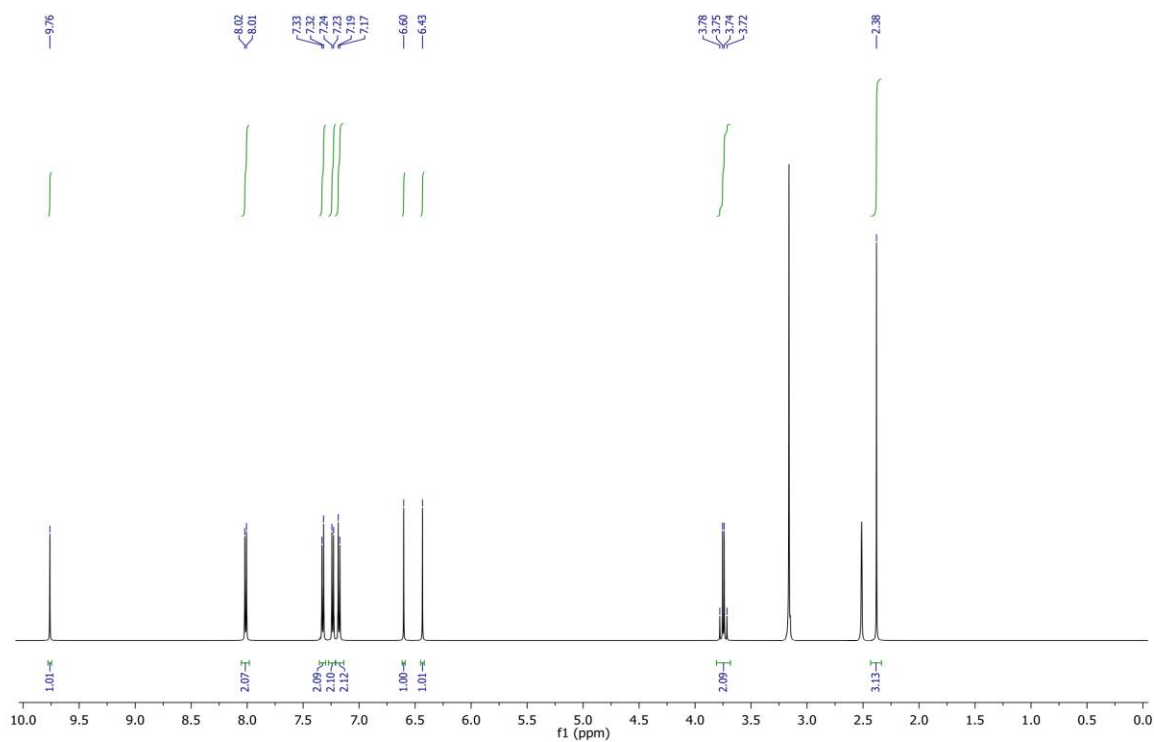

**7g.**  $^{13}\text{C}$  NMR, 100 MHz,  $\text{DMSO-}d_6$

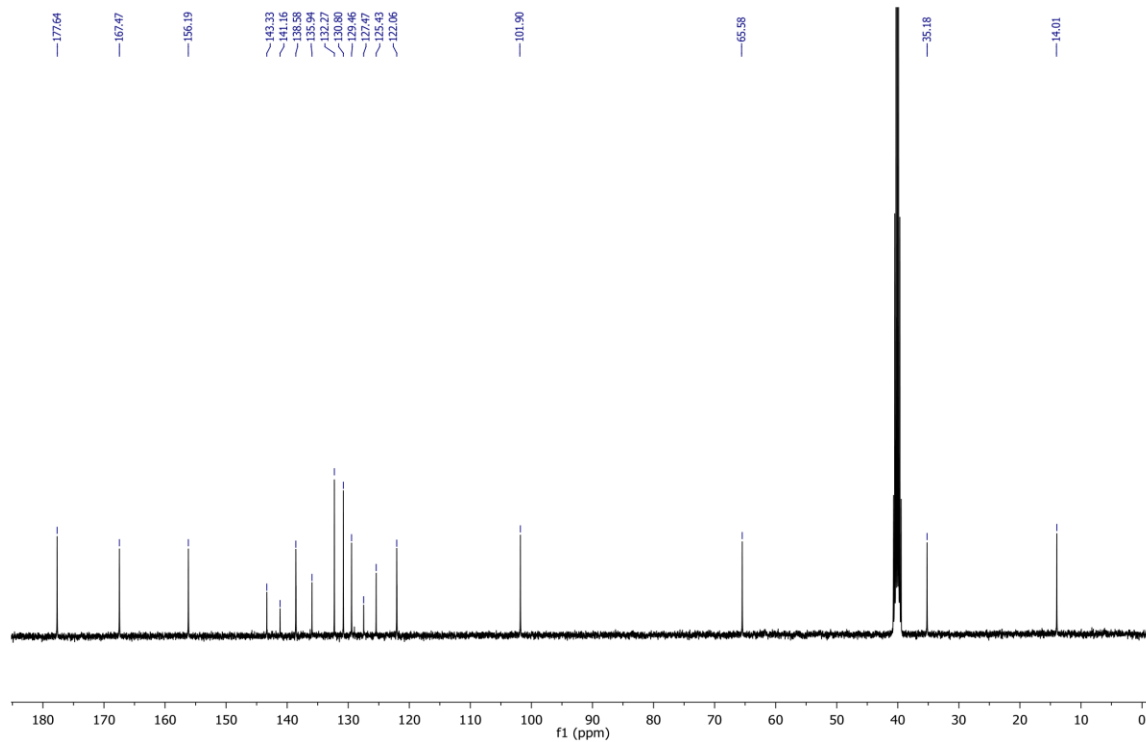

## 7g. HRMS

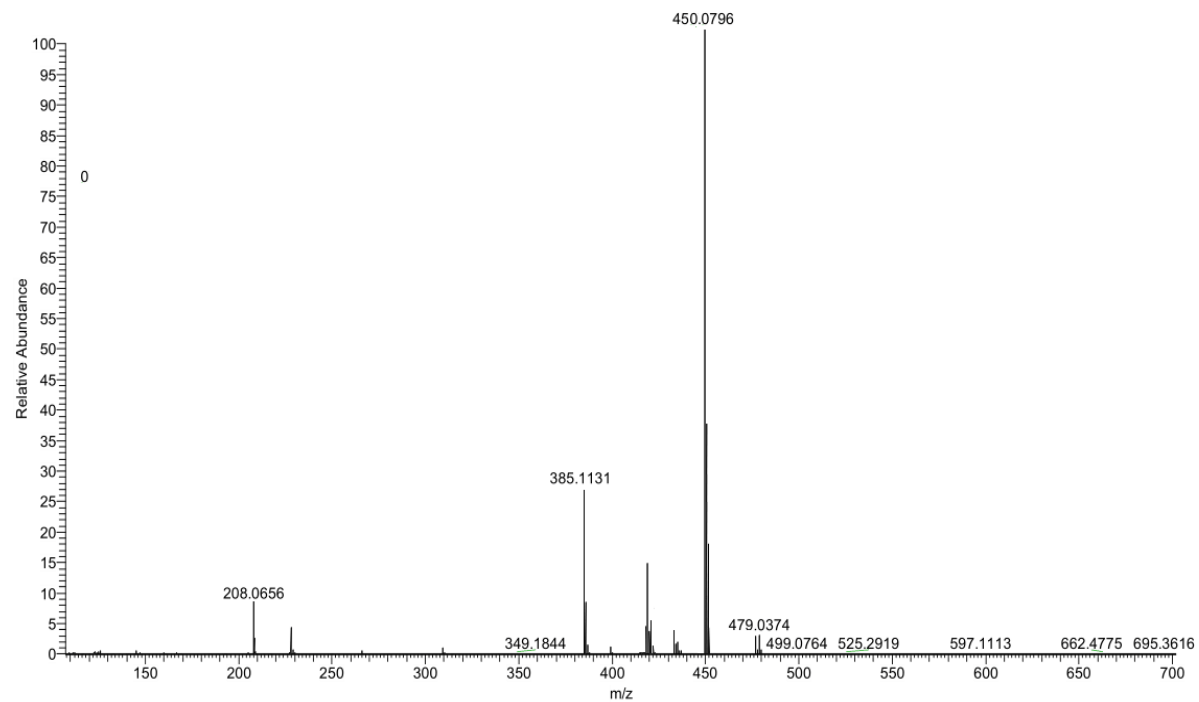

## 7h. $^1\text{H}$ NMR, 400 MHz, $\text{DMSO}-d_6$

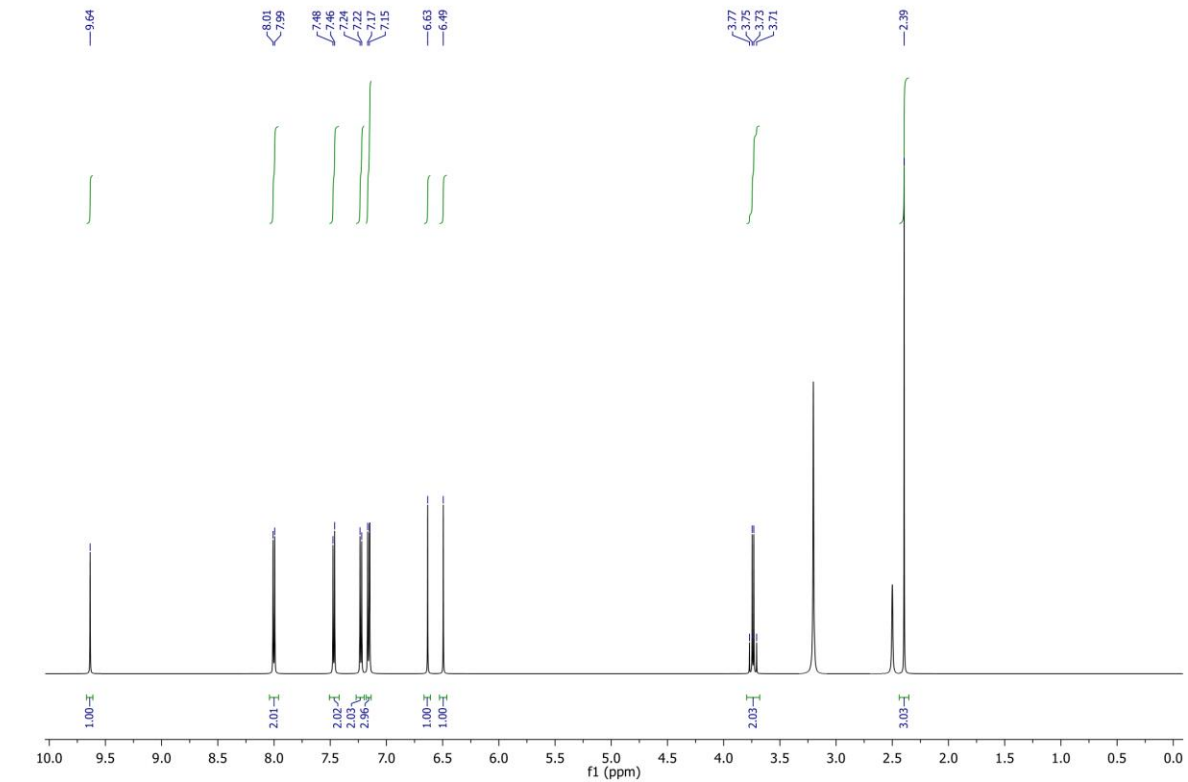

**7h.**  $^{13}\text{C}$  NMR, 100 MHz,  $\text{DMSO}-d_6$

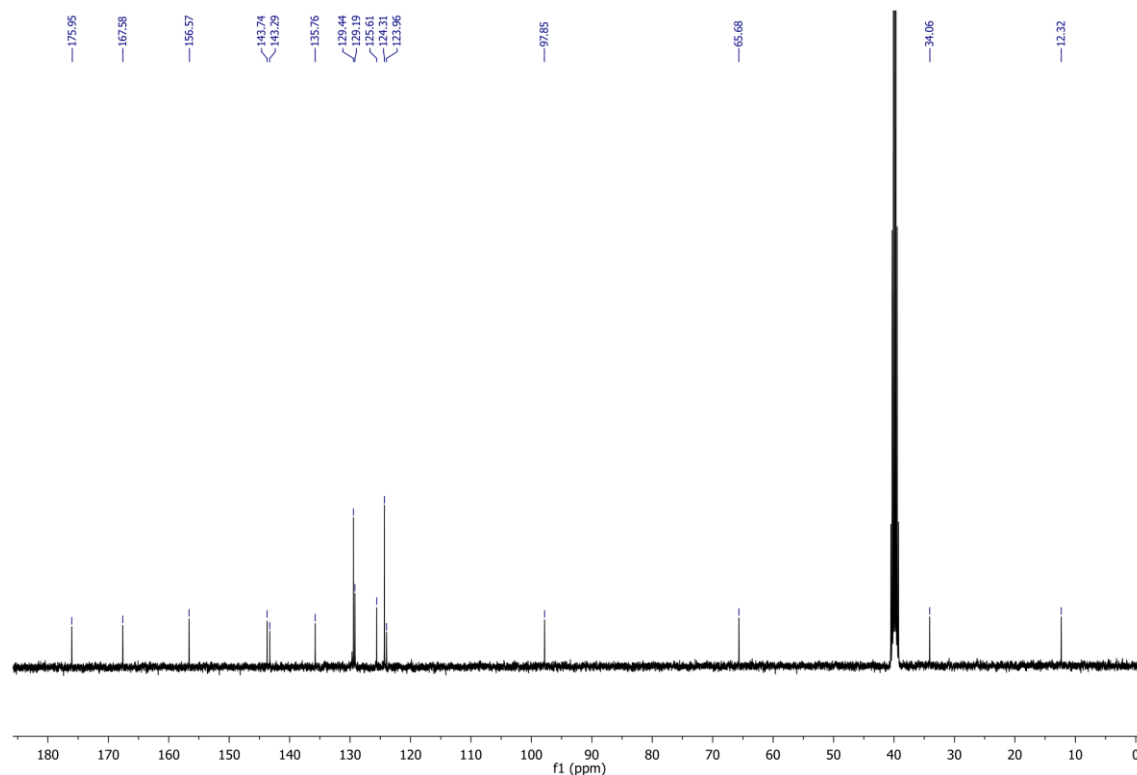

**7h.** HRMS

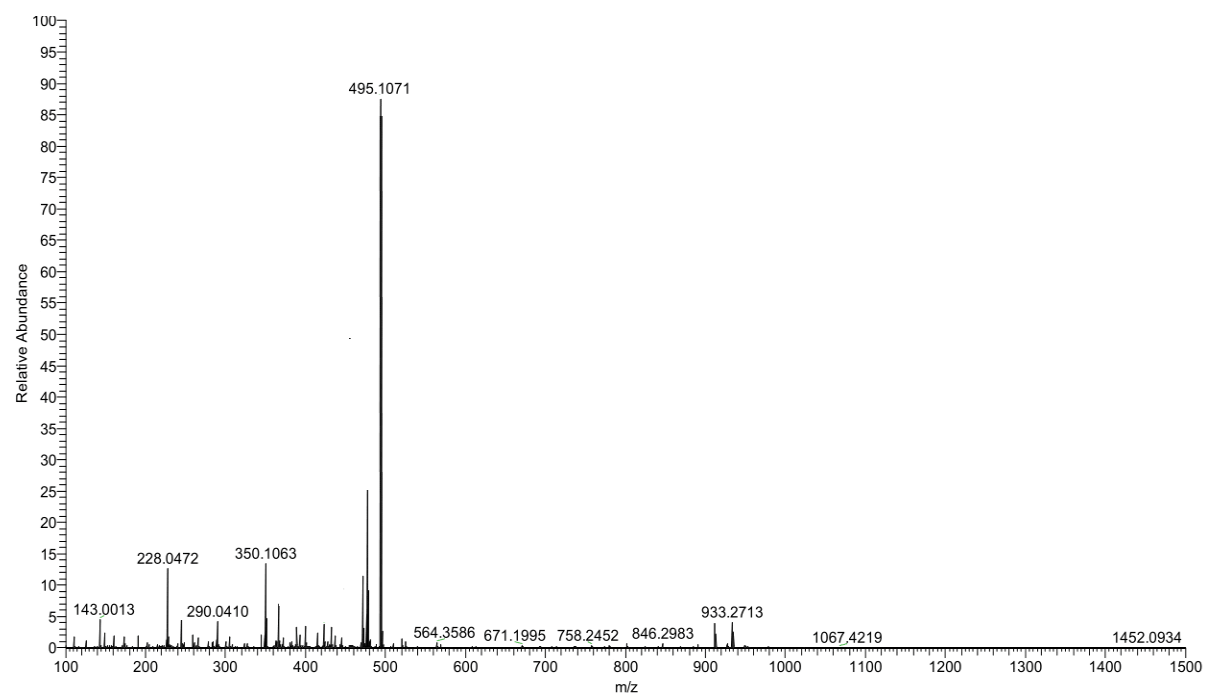

7i.  $^1\text{H}$  NMR, 400 MHz,  $\text{DMSO-}d_6$

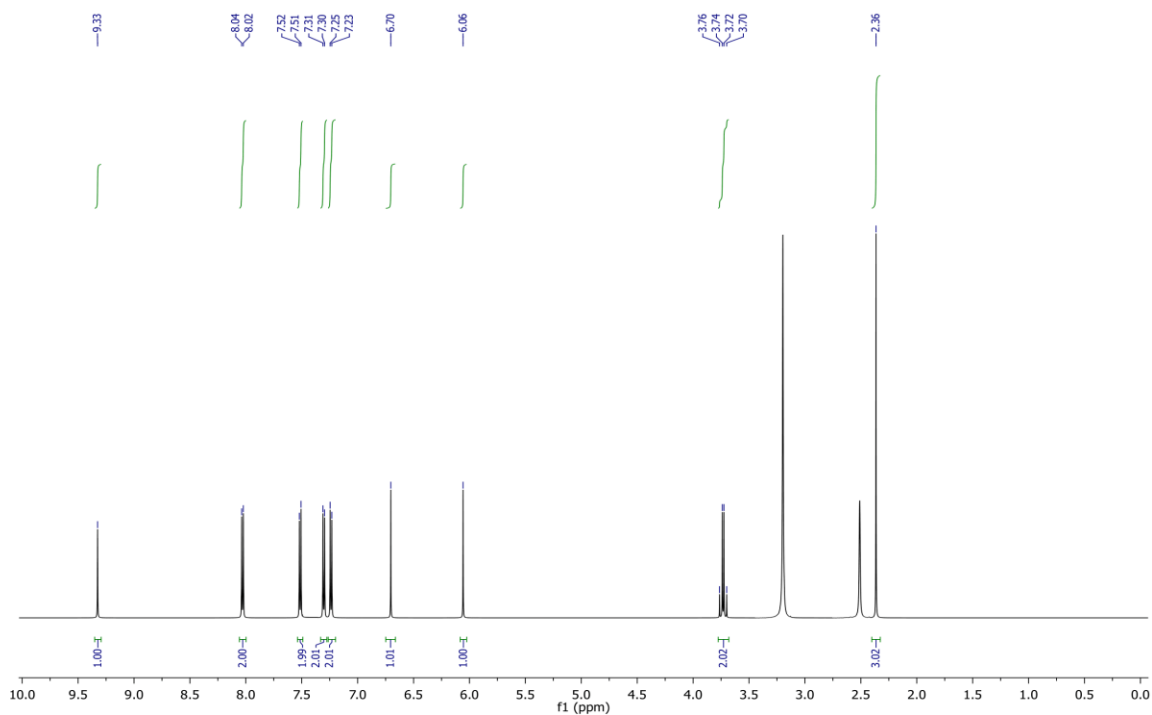

7i.  $^{13}\text{C}$  NMR, 100 MHz,  $\text{DMSO-}d_6$

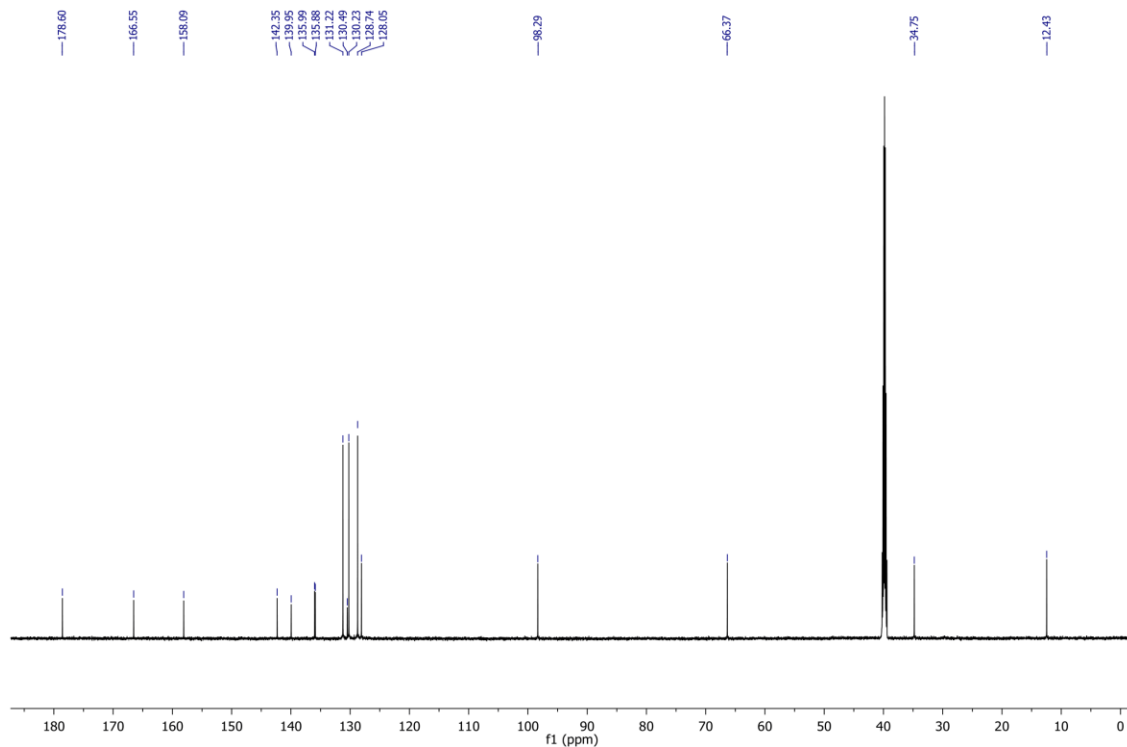



## 7i. HRMS

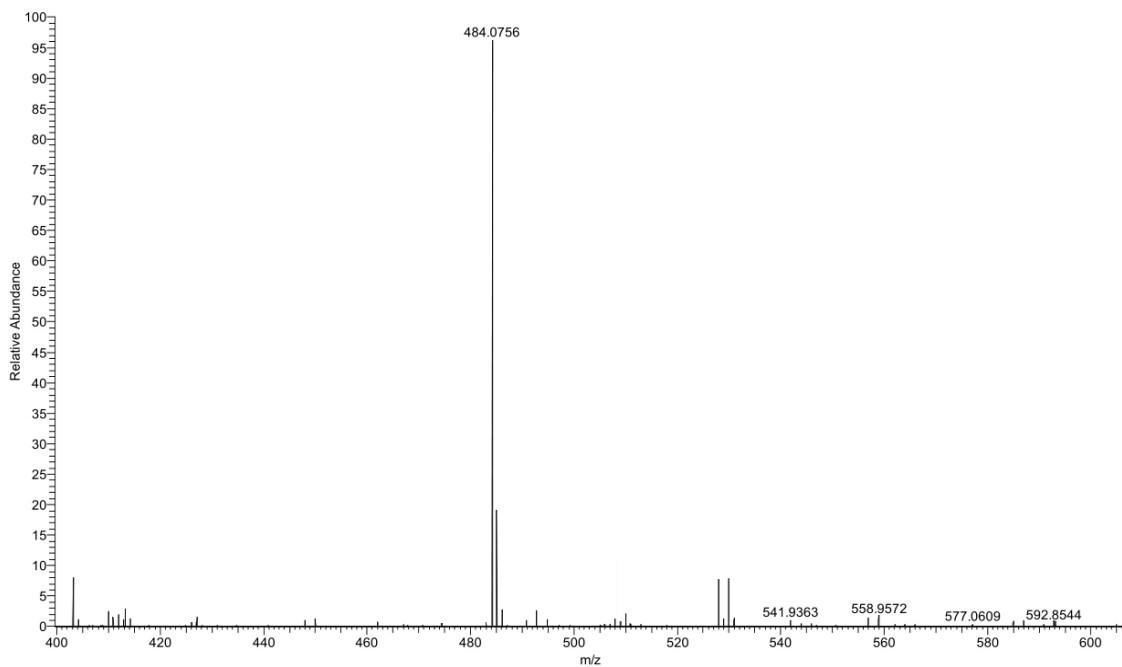

## 7j. $^1\text{H}$ NMR, 400 MHz, $\text{DMSO}-d_6$

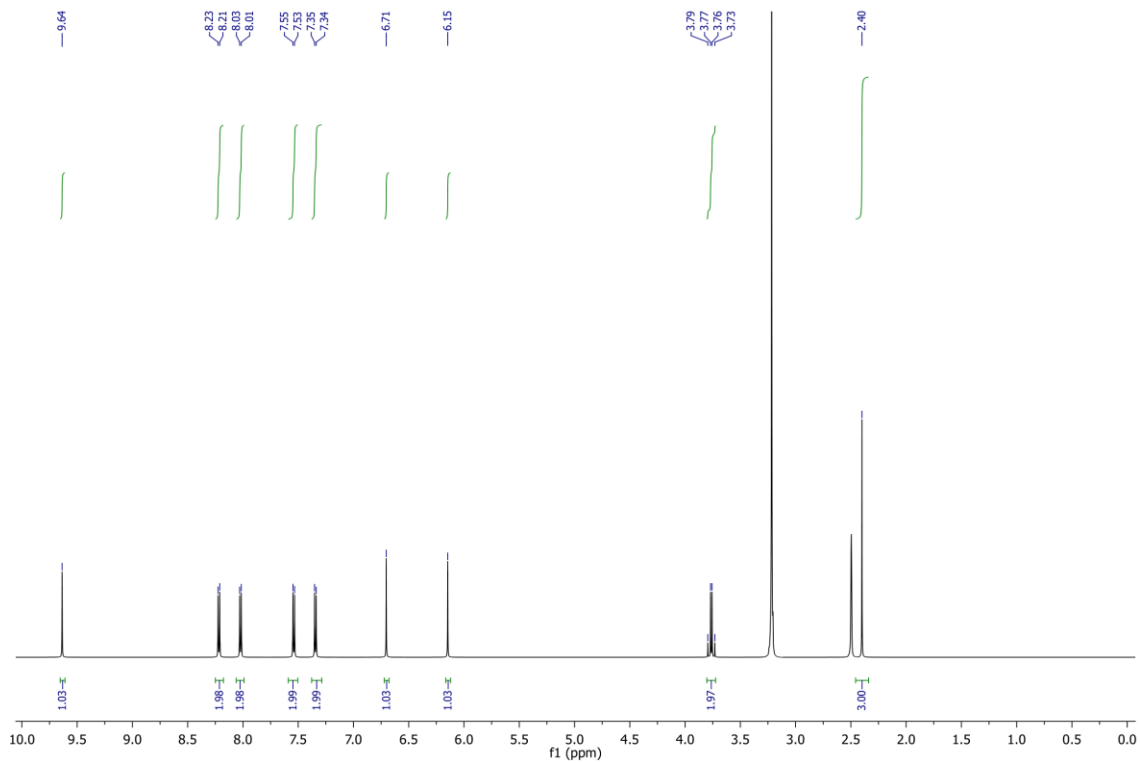

7j.  $^{13}\text{C}$  NMR, 100 MHz,  $\text{DMSO}-d_6$

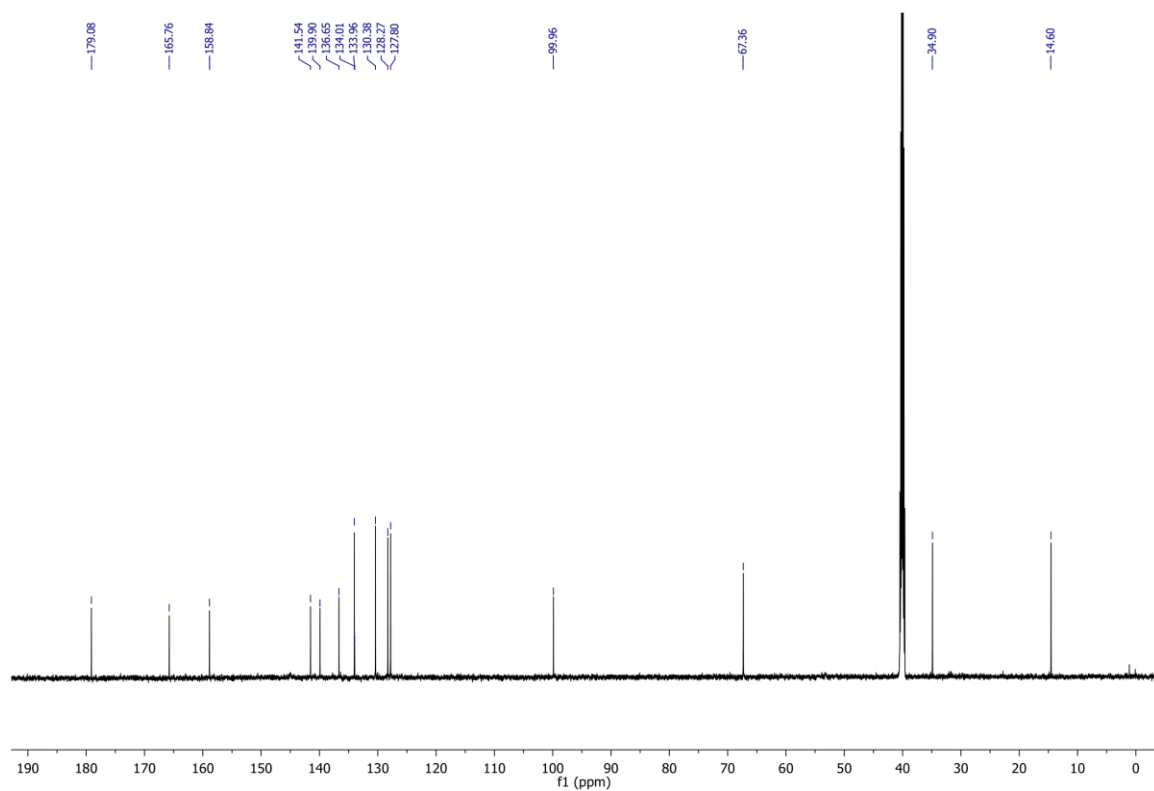

7j. HRMS

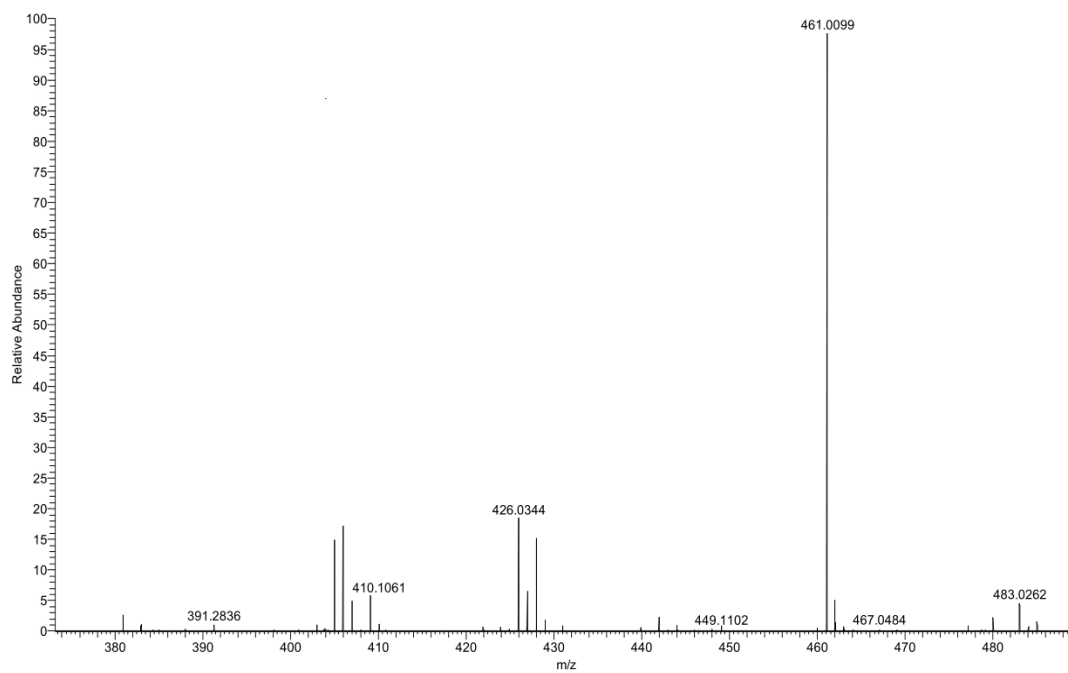

**7k.**  $^1\text{H}$  NMR, 400 MHz,  $\text{DMSO-}d_6$

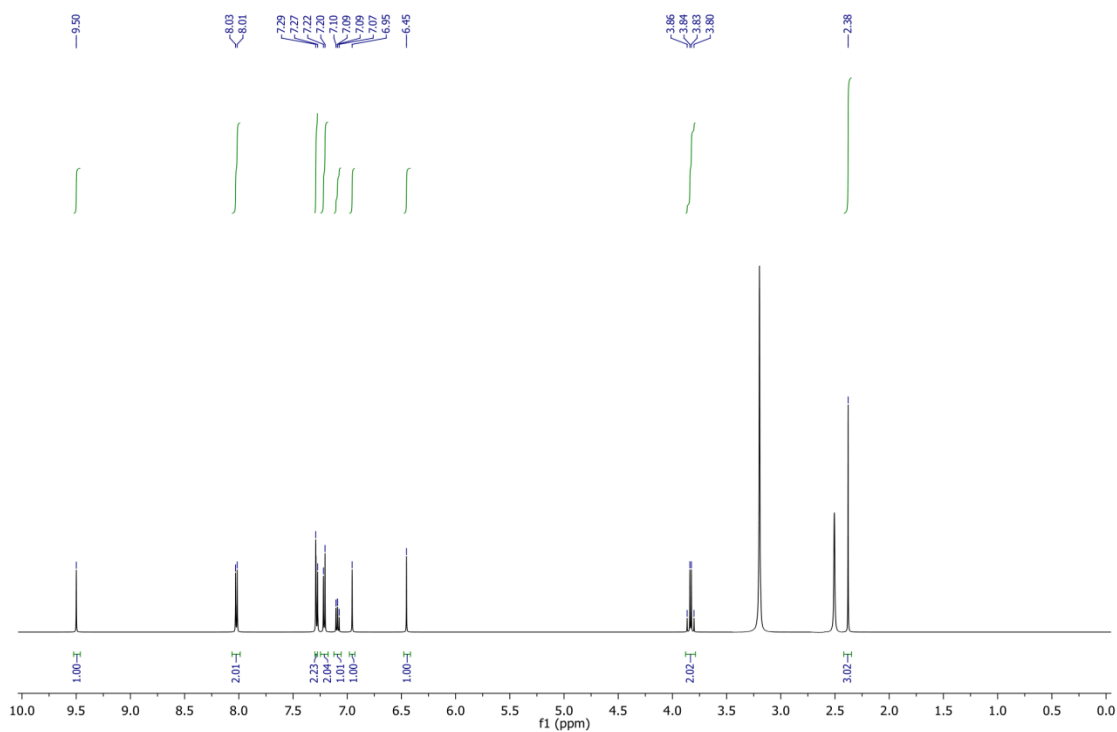

**7k.**  $^{13}\text{C}$  NMR, 100 MHz,  $\text{DMSO-}d_6$

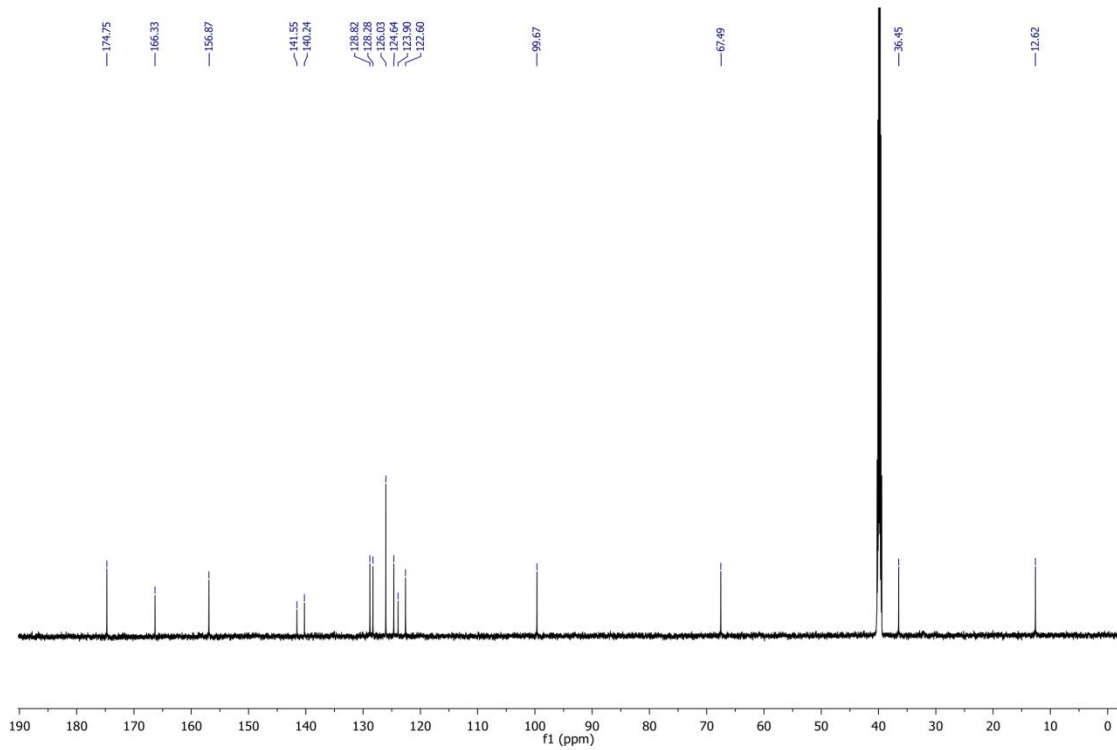

## 7k. HRMS

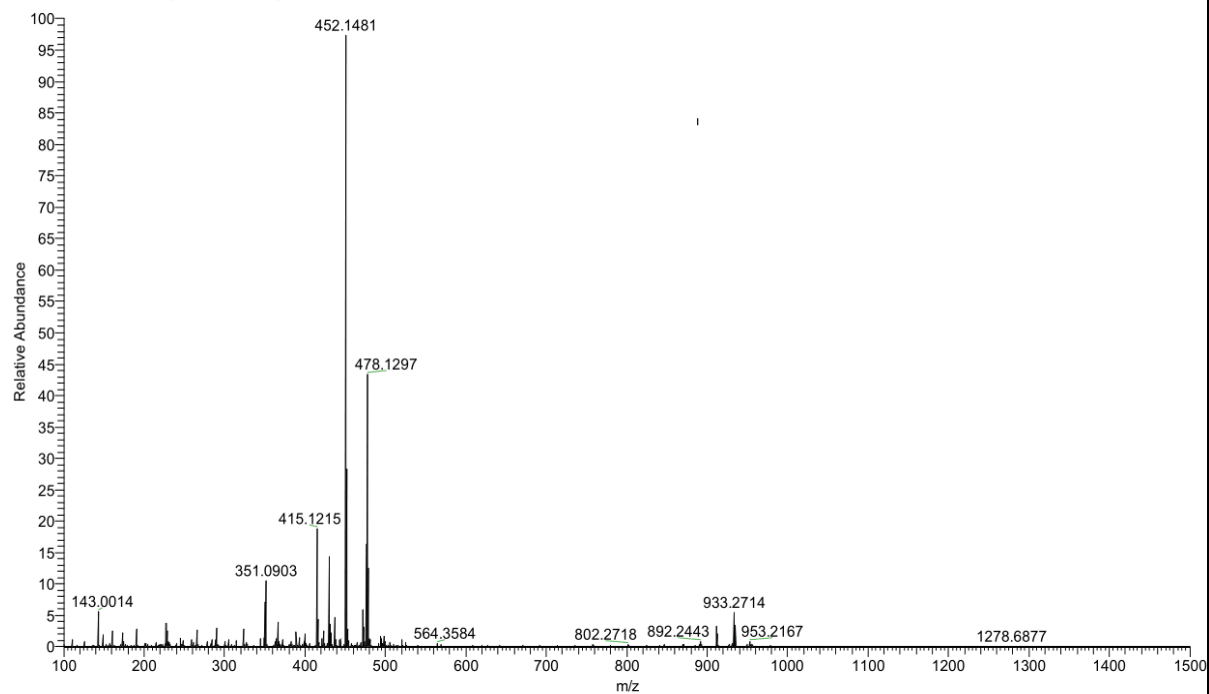

## 7l. $^1\text{H}$ NMR, 400 MHz, $\text{DMSO}-d_6$

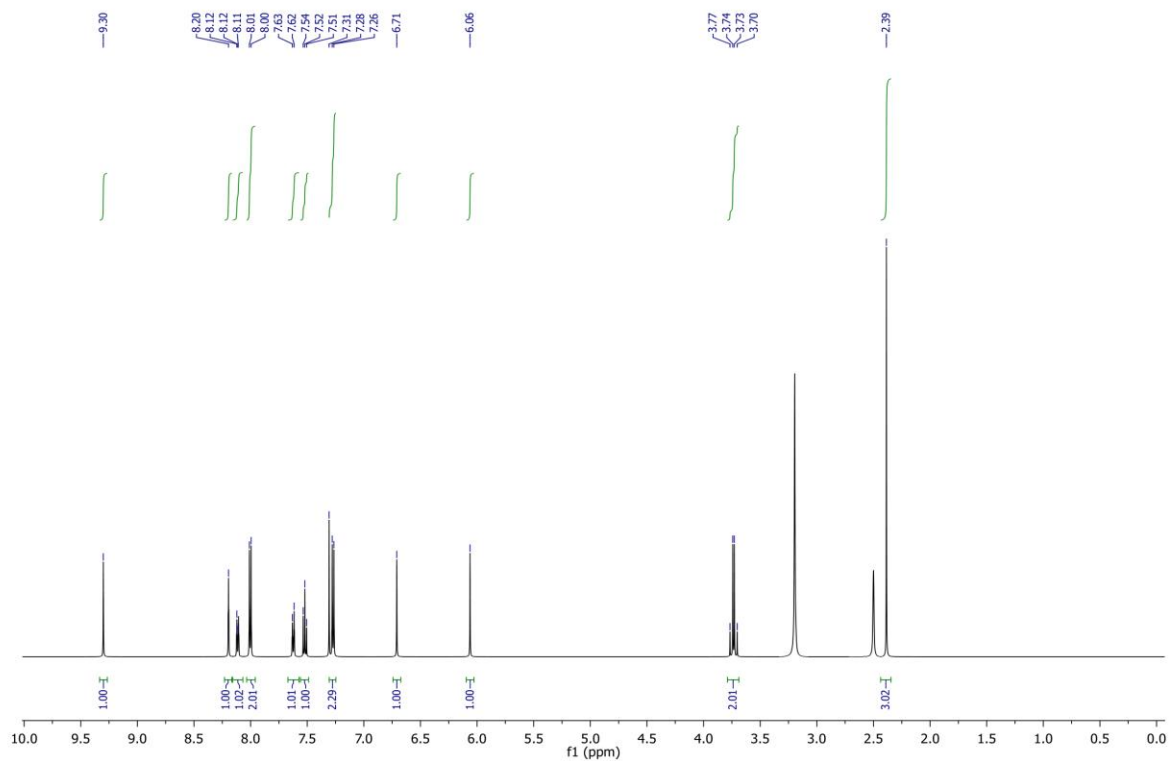

71.  $^{13}\text{C}$  NMR, 100 MHz, DMSO- $d_6$

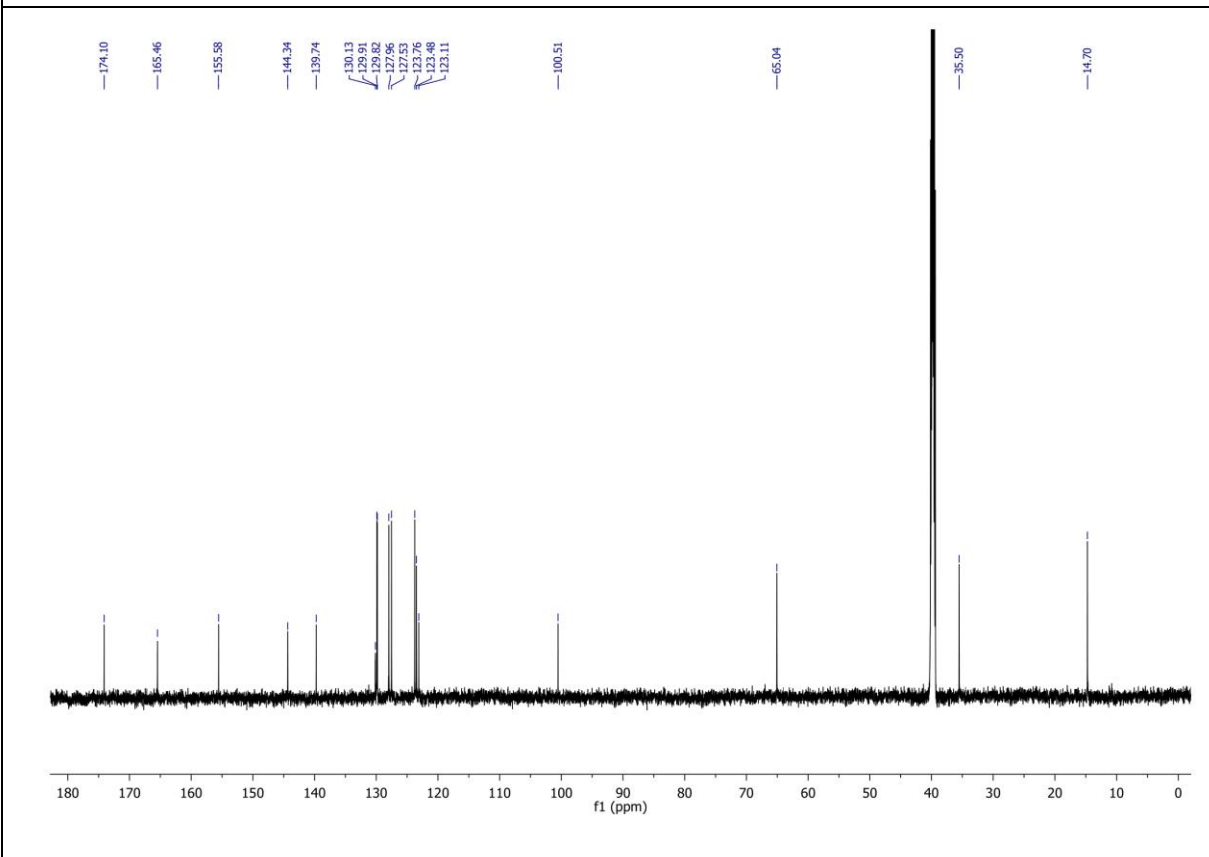

71. HRMS

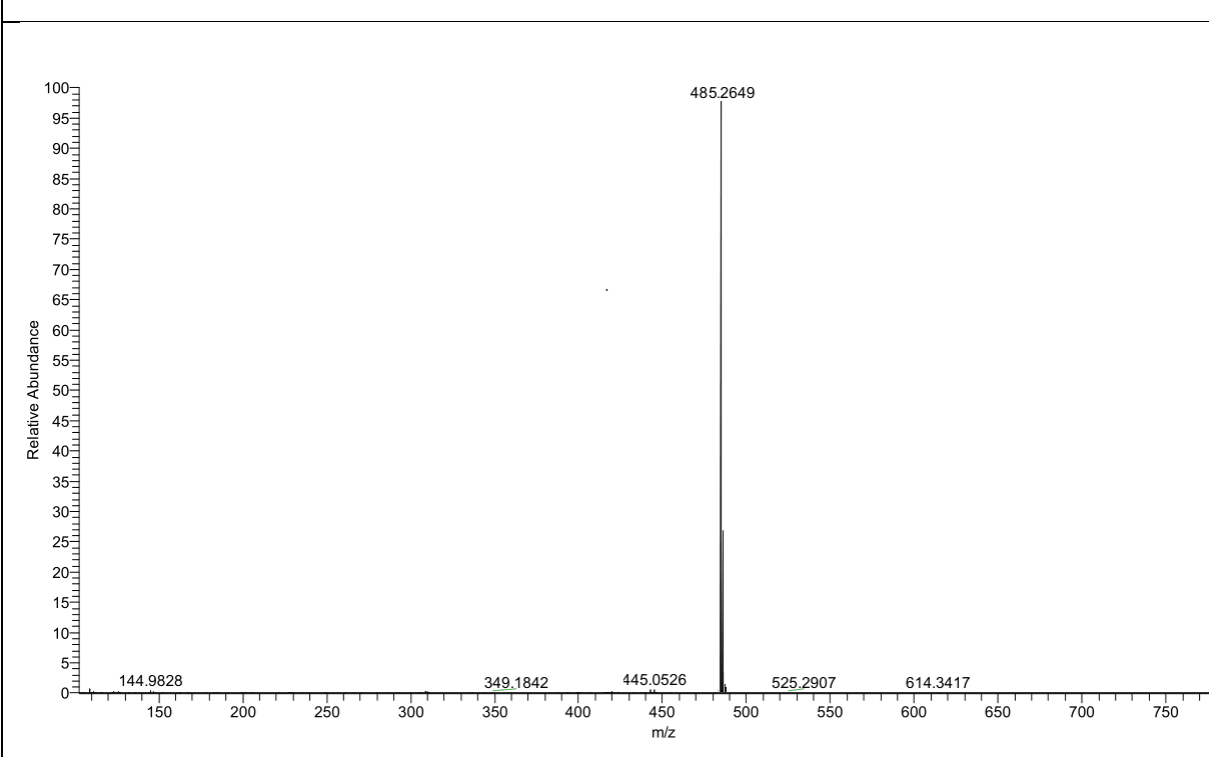

Supplement: s1 [file s1]
